# Supplementary material for: Successful batch and continuous lyophilization of mRNA LNP formulations depend on cryoprotectants and ionizable lipids
Source: Royal Society of Chemistry journal article supplement (doi:10.1039/d2bm02031a), 2023-01-01
Supplement: d2bm02031a1.pdf [file d2bm02031a1.pdf]

- ELECTRONIC SUPPORTING INFORMATION -

**Successful batch and continuous lyophilization of mRNA LNP formulations depends on cryoprotectant and ionizable lipids**

Alexander Lamoot,<sup>a,b,†</sup> Joris Lammens,<sup>c,†</sup> Emily De Lombaerde,<sup>a,b</sup> Zifu Zhong,<sup>a,b</sup> Mark Gontsarik,<sup>a,b</sup> Yong Chen,<sup>a,b</sup> Thomas R.M. De Beer,<sup>c\*</sup> Bruno G. De Geest<sup>a,b\*</sup>

<sup>a.</sup> Department of Pharmaceutics, Ghent University, Ottergemsesteenweg 460, B-9000, Ghent, Belgium.

<sup>b.</sup> Cancer Research Institute Ghent (CRIG), Ghent University, B-9000 Ghent, Belgium.

<sup>c.</sup> Laboratory of Pharmaceutical Process Analytical Technology, Department of Pharmaceutics, Ghent University, Ottergemsesteenweg 460, B-9000 Ghent, Belgium.

† Authors with equal contribution.

**Table S1.** LNP composition

|                                        | <b>S-Ac7-DOg</b><br>mRNA-LNP | <b>S-Ac7-DHDa</b><br>mRNA-LNP | <b>S-Ac7-DOg</b><br>mRNA-LNP<br>Cy5 labelled | <b>S-Ac7-DHDa</b><br>mRNA-LNP<br>Cy5 labelled |
|----------------------------------------|------------------------------|-------------------------------|----------------------------------------------|-----------------------------------------------|
| <b>N/P ratio*</b>                      | 10:1                         | 10:1                          | 10:1                                         | 10:1                                          |
| <b>Target flow rate ratio**</b>        | 2:1                          | 2:1                           | 2:1                                          | 2:1                                           |
| <b>Total formulation volume (mL)</b>   | 2                            | 2                             | 2                                            | 2                                             |
| <b>Amount mRNA (eGFP or Fluc) (µg)</b> | 200                          | 200                           | 200                                          | 200                                           |
| <b>S-Ac7-DOg (mol%)</b>                | 50                           | -                             | 50                                           | -                                             |
| <b>S-Ac7-DHDa (mol%)</b>               | -                            | 50                            | -                                            | 50                                            |
| <b>DSPC (mol%)</b>                     | 10                           | 10                            | 9.9                                          | 9.9                                           |
| <b>DSPE-Cy5 (mol%)</b>                 | -                            | -                             | 0.1                                          | 0.1                                           |
| <b>Cholesterol (mol%)</b>              | 38.5                         | 38.5                          | 38.5                                         | 38.5                                          |
| <b>DMG-PEG<sub>2000</sub> (mol%)</b>   | 1.5                          | 1.5                           | 1.5                                          | 1.5                                           |

\*Target molar charge ratio (mol ionizable lipid: mol RNA)

\*\*aqueous phase volume : organic phase volume
